# Supplementary material for: Quantitative assessment of daratumumab in serum via intact light chain measurement using liquid chromatography-high resolution mass spectrometry: a method suitable for therapeutic drug monitoring
Source: Royal Society of Chemistry journal article supplement (doi:10.1039/d4ay00404c), 2024-01-01
Supplement: d4ay00404c1.pdf [file d4ay00404c1.pdf]

## Quantitative Assessment of Daratumumab in Serum via Intact Light Chains Measurement Using Liquid Chromatography-High Resolution Mass Spectrometry: A Method suitable for Therapeutic Drug Monitoring

Giovanni Canil<sup>1</sup>, Gianmaria Miolo<sup>2</sup>, Mariapaola Simula<sup>3</sup>, Maurizio Rupolo<sup>4</sup>, Agostino Steffan<sup>1</sup>, and Giuseppe Corona<sup>1\*</sup>

1. Immunopathology and Cancer Biomarkers Unit, Centro di Riferimento Oncologico (CRO), IRCCS Aviano, 33081 Aviano, Italy.

2. Medical Oncology and Cancer Prevention Unit, Centro di Riferimento Oncologico di Aviano (CRO), IRCCS, 33081 Aviano, Italy.

3. Clinical Pathology Unit, ASFO General Hospital 33170 Pordenone, Italy.

4. Oncohematology and Cell Therapy Unit, Centro di Riferimento Oncologico di Aviano (CRO), IRCCS, 33081 Aviano, Italy.

\*Corresponding author Giuseppe Corona

Immunopathology and Cancer Biomarkers Unit

Centro di Riferimento Oncologico (CRO), IRCCS Aviano, 33081 Aviano, Italy.

Phone: +39 0434 659666

Email: giuseppe.corona@cro.it

### Supporting Information

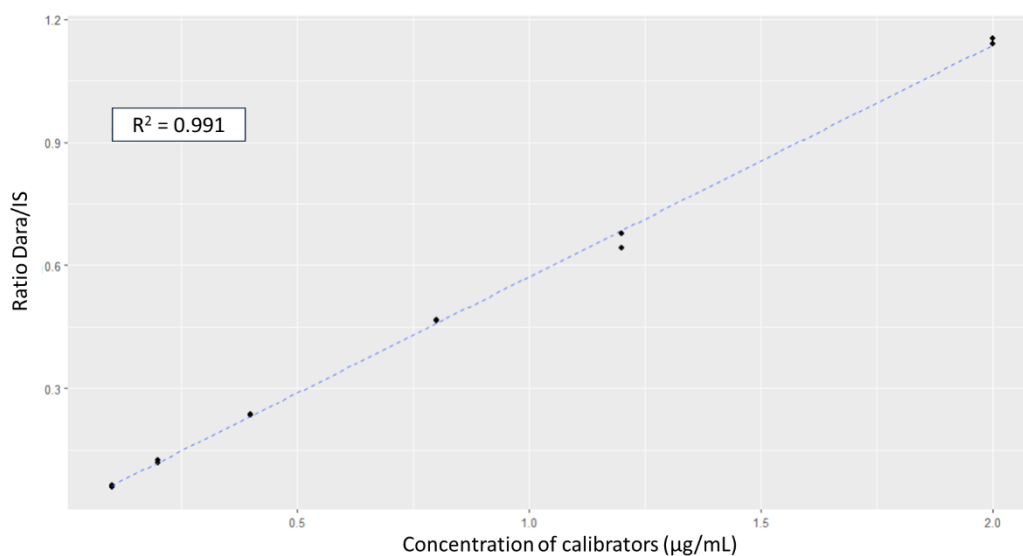

Figure S1. Representative calibration curve of Daratumumab in serum, run in duplicate.

Table S1. Method comparison of Dara quantification.

| Author (year)         | Matrix                 | Sample enrichment | Sample treatment                              | Trypsinization     | LC                                                                       | MS                                                             | Figures of merit                        |
|-----------------------|------------------------|-------------------|-----------------------------------------------|--------------------|--------------------------------------------------------------------------|----------------------------------------------------------------|-----------------------------------------|
| Our method            | Human serum<br>20 uL   | Melon gel         | Denaturation<br>Reduction                     | Not required       | UHPLC<br>MABPac® RP<br>2.1 × 50 mm<br>5 min gradient                     | OT<br>Thermo QExactive Plus<br>Full Scan,<br>resolution 17500. | LLOQ=100<br>µg/mL<br>RE <9%<br>RSD <6%  |
| Zajec et al. (2018)   | Human serum<br>2 uL    | Melon gel         | Denaturation<br>alkylation<br>reduction       | Overnight at 37 °C | nano-LC system<br>PepMap C18<br>75 µmID× 250 mm, 2 µm<br>28 min gradient | OT<br>Thermo Fusion Lumos Tribrid<br>scheduled PRM             | LLOQ=1<br>µg/mL                         |
| Noori et al. (2021)   | Human serum<br>0.12 uL | Not reported      | Denaturation<br>alkylation<br>reduction       | Overnight at 37 °C | nano-LC system<br>PepMap C18<br>75 µmID× 250 mm, 2 µm<br>30 min gradient | OT<br>Thermo Fusion Lumos Tribrid<br>scheduled PRM             | LLOQ=1<br>µg/mL                         |
| Yamaoka et al. (2023) | Human serum<br>50 uL   | Protein A         | Denaturation<br>alkylation<br>reduction       | 120 min at 45 °C   | UHPLC<br>Inertsil Peptides C18<br>4 µm, 2.1×150 mm<br>Gradient 13 min    | TQ<br>Sciex QTRAP 4500<br>MRM                                  | LLOQ=50<br>µg/mL<br>RE <13%<br>RSD < 9% |
| Li et al. (2024)      | Rat serum<br>10 uL     | Not required      | Denaturation<br>No reduction<br>No alkylation | 30 min at 45 °C    | UHPLC<br>C18 2.1 × 150 mm, 1.7 µm<br>Gradient 10 min                     | TQ<br>Agilent 6495<br>MRM                                      | LLOQ=1<br>µg/mL<br>RE <15%<br>RSD <15%  |

Abbreviations: DTT dithiothreitol, IAA iodoacetamide, PRM Parallel reaction monitoring, MRM Multiple reaction monitoring, SPE solid phase extraction, OT orbitrap, TQ triple quadrupole, LLOQ lower limit of quantification, UHPLC ultra high-performance liquid chromatography, RE relative error, RSD relative standard deviation.

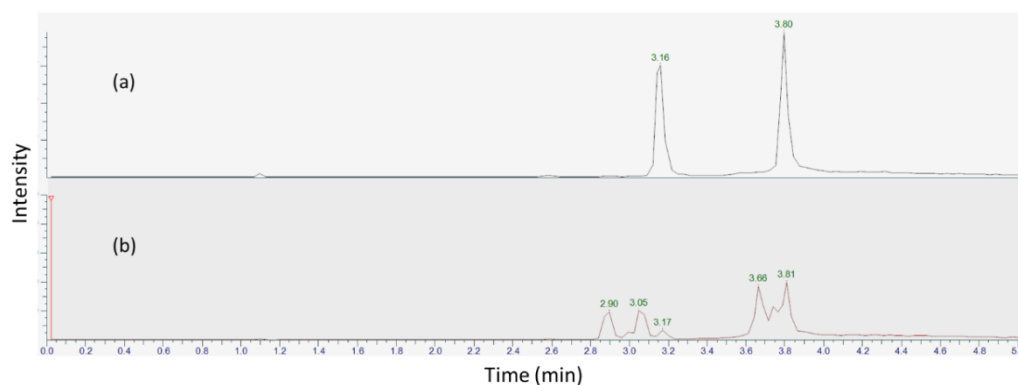

Figure S2. Effect of different reducing agents on the chromatographic separation of light and heavy chains of Dara. (a) DTT as reducing agent (Tris·HCl 0.2 M, Guanidine·HCl 12M, DTT 0.1 M, incubation for 30 min at

60 °C). (b) TCEP as reducing agent (0.05 M, used in combination with NH<sub>4</sub>HCO<sub>3</sub> 0.025 M, incubation for 30 min at 37 °C).

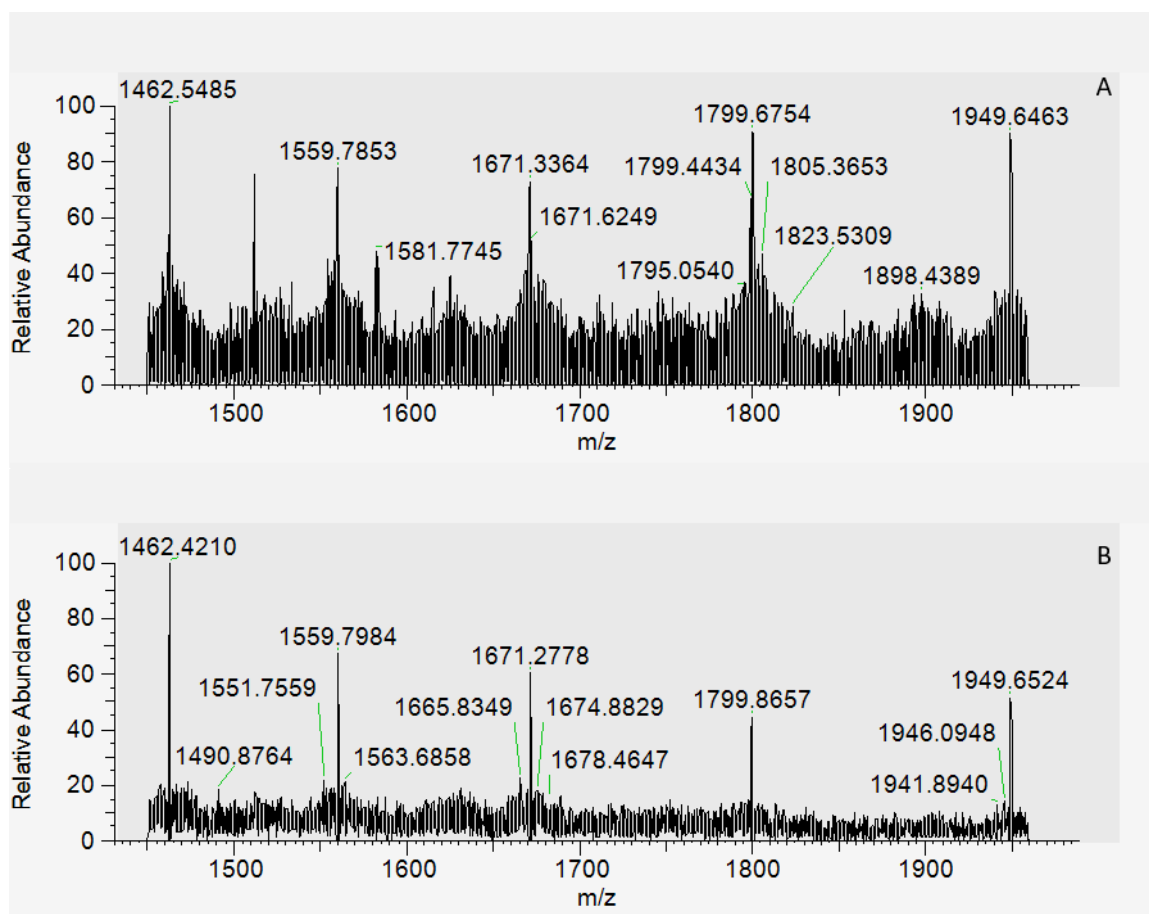

Figure S3. Dara light chain MS spectrum evaluated at 140000 (A) and 17500 (B) resolution in LLOQ serum sample. The mean S/N for the charge states was 2.5 in A and 5 in B.

Table S2. Linearity of Dara calibration curve over 7 days

| Day | Intercept*             | Slope*                 | R <sup>2</sup> |
|-----|------------------------|------------------------|----------------|
| 1   | 3.237×10 <sup>-3</sup> | 5.551×10 <sup>-1</sup> | 0.991          |
| 2   | 4.629×10 <sup>-3</sup> | 5.701×10 <sup>-1</sup> | 0.996          |
| 3   | 6.545×10 <sup>-3</sup> | 4.704×10 <sup>-1</sup> | 0.996          |
| 4   | 5.356×10 <sup>-3</sup> | 5.300×10 <sup>-1</sup> | 0.995          |
| 5   | 8.589×10 <sup>-3</sup> | 5.381×10 <sup>-1</sup> | 0.993          |
| 6   | 2.625×10 <sup>-3</sup> | 5.872×10 <sup>-1</sup> | 0.992          |
| 7   | 6.933×10 <sup>-3</sup> | 5.788×10 <sup>-1</sup> | 0.994          |

\*Obtained using 1/x<sup>2</sup> weighting factor.

Generic expression for the calibration curve: Ratio Dara/IS = Intercept + Slope × Concentration.

Table S3. Accuracy and Precision for Daratumumab calibrators

|                        | <b>Cal 1<br/>100<br/>µg/mL</b> | <b>Cal 2<br/>200<br/>µg/mL</b> | <b>Cal 3<br/>400<br/>µg/mL</b> | <b>Cal 4<br/>800<br/>µg/mL</b> | <b>Cal 5<br/>1200<br/>µg/mL</b> | <b>Cal 6<br/>2000 µ<br/>g/mL</b> |
|------------------------|--------------------------------|--------------------------------|--------------------------------|--------------------------------|---------------------------------|----------------------------------|
| <b>Day 1</b>           | 100                            | 211                            | 425                            | 815                            | 1213                            | 1880                             |
|                        | 94                             | 192                            | 425                            | 809                            | 1210                            | 1855                             |
| <b>Day 2</b>           | 94                             | 200                            | 408                            | 809                            | 1120                            | 1994                             |
|                        | 102                            | 211                            | 405                            | 812                            | 1181                            | 2014                             |
| <b>Day 3</b>           | 99                             | 203                            | 416                            | 810                            | 1198                            | 1901                             |
|                        | 99                             | 191                            | 420                            | 818                            | 1202                            | 1932                             |
| <b>Day 4</b>           | 99                             | 201                            | 418                            | 824                            | 1191                            | 1936                             |
|                        | 99                             | 195                            | 424                            | 813                            | 1191                            | 1881                             |
| <b>Day 5</b>           | 98                             | 195                            | 429                            | 796                            | 1152                            | 1916                             |
|                        | 100                            | 196                            | 435                            | 818                            | 1187                            | 1965                             |
| <b>Day 6</b>           | 95                             | 202                            | 407                            | 786                            | 1158                            | 2094                             |
|                        | 101                            | 207                            | 436                            | 800                            | 1148                            | 1880                             |
| <b>Day 7</b>           | 95                             | 201                            | 410                            | 828                            | 1161                            | 1943                             |
|                        | 98                             | 209                            | 423                            | 827                            | 1167                            | 1899                             |
| <b>Mean ± SD µg/mL</b> | <b>98 ± 3</b>                  | <b>201 ± 7</b>                 | <b>420 ± 10</b>                | <b>812 ± 12</b>                | <b>1177 ± 27</b>                | <b>1935 ± 64</b>                 |
| <b>RSD</b>             | <b>2.6</b>                     | <b>3.3</b>                     | <b>2.4</b>                     | <b>1.4</b>                     | <b>2.3</b>                      | <b>3.3</b>                       |
| <b>RE</b>              | <b>-2.0</b>                    | <b>0.5</b>                     | <b>5.0</b>                     | <b>1.5</b>                     | <b>-1.9</b>                     | <b>-3.3</b>                      |

Table S4. Intra-day Accuracy and Precision for Daratumumab.

|      | Nominal Conc<br>(µg/mL) | Day 1 (n=5)<br>mean±SD<br>%RSD, %RE | Day 2 (n=5)<br>mean±SD<br>%RSD, %RE | Day 3 (n=5)<br>mean±SD<br>%RSD, %RE |
|------|-------------------------|-------------------------------------|-------------------------------------|-------------------------------------|
| LLOQ | 100                     | 96 ± 4<br>3.7; -3.9                 | 95 ± 5<br>5.2; -4.9                 | 93 ± 3<br>3.4; -6.7                 |
| QCL  | 300                     | 309 ± 13<br>4.3; 2.9                | 306.5 ± 10<br>3.2; 2.2              | 328 ± 7<br>2.0; 9.3                 |
| QCM  | 900                     | 958 ± 55<br>5.8; 6.5                | 905.6 ± 28<br>3.0; 0.6              | 938.4 ± 10<br>1.0; 4.3              |
| QCH  | 1500                    | 1439 ± 38<br>2.6; -4.0              | 1417 ± 20<br>1.4; -5.5              | 1545 ± 39<br>2.5; 3.0               |

Table S5. Selectivity for Daratumumab and IS evaluated in 6 drug-free sera matrices.

|                 | Dara %* | IS %** |
|-----------------|---------|--------|
| <b>Matrix 1</b> | 9.2     | 2.5    |
| <b>Matrix 2</b> | 9.6     | 1.9    |
| <b>Matrix 3</b> | 9.2     | 1.9    |
| <b>Matrix 4</b> | 7.5     | 1.6    |
| <b>Matrix 5</b> | 9.7     | 3.4    |
| <b>Matrix 6</b> | 10.3    | 2.2    |

\* Calculated as ratio of the Dara signal in matrix over the signal of Dara in the LOQ calibrator.

\*\* Calculated as ratio of the IS signal in matrix over the mean signal of IS.

Table S6. Matrix effect evaluated for Daratumumab in 6 drug-free sera matrices from healthy donors.

|                                | Matrix 1        |                  | Matrix 2       |                  | Matrix 3       |                  | Matrix 4        |                  | Matrix 5       |                  | Matrix 6        |                  |
|--------------------------------|-----------------|------------------|----------------|------------------|----------------|------------------|-----------------|------------------|----------------|------------------|-----------------|------------------|
| Actual ( $\mu\text{g/mL}$ )    | QCL<br>300      | QCH<br>1500      | QCL<br>300     | QCH<br>1500      | QCL<br>300     | QCH<br>1500      | QCL<br>300      | QCH<br>1500      | QCL<br>300     | QCH<br>1500      | QCL<br>300      | QCH<br>1500      |
| measured                       | 347             | 1541             | 321            | 1419             | 323            | 1594             | 325             | 1642             | 317            | 1544             | 330             | 1487             |
|                                | 338             | 1546             | 307            | 1425             | 317            | 1509             | 341             | 1538             | 332            | 1560             | 315             | 1494             |
|                                | 326             | 1502             | 309            | 1475             | 327            | 1546             | 348             | 1652             | 318            | 1508             | 333             | 1521             |
| Mean $\pm$ SD $\mu\text{g/mL}$ | 337<br>$\pm$ 11 | 1530<br>$\pm$ 24 | 312<br>$\pm$ 7 | 1440<br>$\pm$ 30 | 322<br>$\pm$ 5 | 1550<br>$\pm$ 42 | 338<br>$\pm$ 12 | 1611<br>$\pm$ 63 | 322<br>$\pm$ 8 | 1537<br>$\pm$ 27 | 326<br>$\pm$ 10 | 1500<br>$\pm$ 18 |
| %RSD                           | 3.1             | 1.6              | 2.4            | 2.1              | 1.5            | 2.7              | 3.5             | 3.9              | 2.5            | 1.7              | 3.0             | 1.2              |
| %RE                            | 12.3            | 2.0              | 4.1            | -4.0             | 7.3            | 3.3              | 12.7            | 7.4              | 7.5            | 2.5              | 8.7             | 0.0              |

Table S7. Stability evaluated for Daratumumab in three different conditions.

|                                         | 3 days at 4 °C* |                | 55 days 4 °C |               | 55 days -20 °C |               |
|-----------------------------------------|-----------------|----------------|--------------|---------------|----------------|---------------|
| Actual ( $\mu\text{g/mL}$ )             | QCL 300         | QCH 1500       | QCL 300      | QCH 1500      | QCL 300        | QCH 1500      |
| measured values<br>( $\mu\text{g/mL}$ ) | 326             | 1439           | 304          | 1497          | 308            | 1457          |
|                                         | 339             | 1492           | 320          | 1460          | 329            | 1479          |
|                                         | 351             | 1656           | 313          | 1497          | 328            | 1580          |
| Mean $\pm$ SD $\mu\text{g/mL}$          | 339 $\pm$ 13    | 1529 $\pm$ 113 | 312 $\pm$ 8  | 1485 $\pm$ 22 | 321 $\pm$ 12   | 1505 $\pm$ 66 |
| %RSD                                    | 3.8             | 7.4            | 2.6          | 1.5           | 3.7            | 4.4           |
| %RE                                     | 12.9            | 1.9            | 4.1          | -1.0          | 7.2            | 0.3           |

\*Extracted samples in autosampler.
